# Supplementary material for: Ribosomal Protein S27/Metallopanstimulin-1 (RPS27) in Glioma—A New Disease Biomarker?
Source: PubMed Central journal article supplement (PMC7281545; doi:10.3390/cancers12051085), 2020-04-27
Supplement: cancers-12-01085-s001.pdf [file cancers-12-01085-s001.pdf]

## Supplementary Materials: Ribosomal Protein S27/Metallopanstimulin-1 (RPS27) in Glioma—A New Disease Biomarker?

Jonas Feldheim, Almuth F. Kessler, Dominik Schmitt, Ellaine Salvador, Camelia M. Monoranu, Julia J. Feldheim, Ralf-Ingo Ernestus, Mario Löhr and Carsten Hagemann

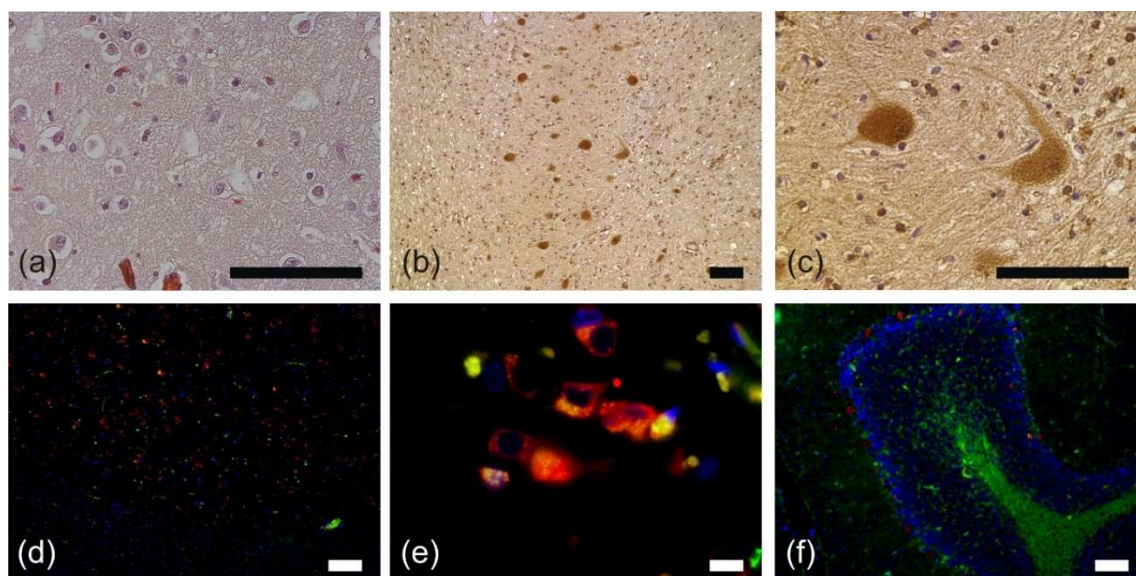

**Figure S1.** RPS27 staining in Alzheimer's disease. (a) H&E staining of the cerebrum of an Alzheimer's patient. (b) and (c) RPS27-DAB staining in the cerebellum. Neurons were positive. (d) and (e) Immunofluorescence double staining for RPS27 (red) and neurons (NeuN = green) in the cerebrum of an Alzheimer's patient. (f) Immunofluorescence double staining for RPS27 (red) and astrocytes (GFAP = green) in the cerebellum of an Alzheimer's patient. DAPI = blue, scale bars = 100  $\mu\text{m}$ .

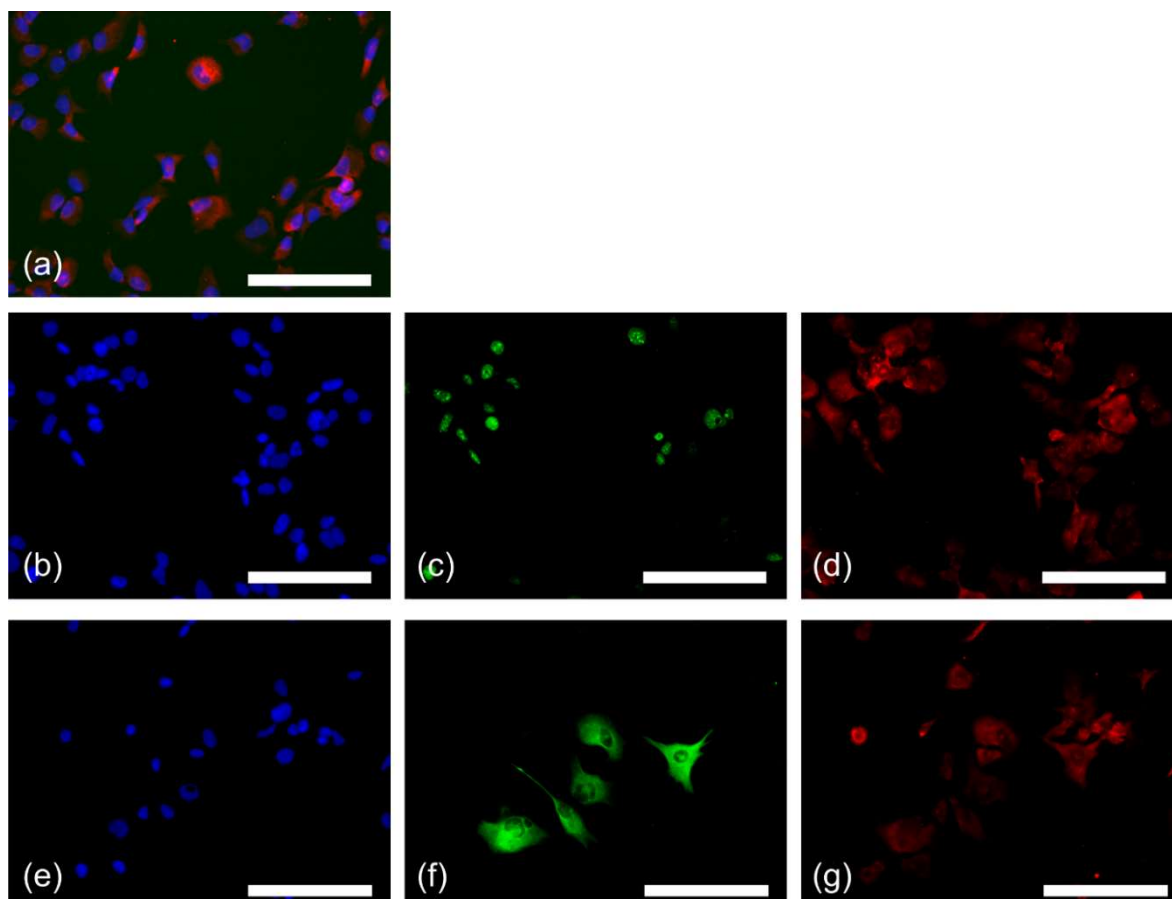

**Figure S2.** RPS27, CD68, Ki67 and GFAP staining in GBM stem-like cells. (a) Immunofluorescence double staining for RPS27 (red) and CD68 (green). (b) DAPI (blue), (c) Ki67 (green) and (d) RPS27 (red) immunofluorescence staining. (e) DAPI (blue), (f) GFAP (green) and (g) RPS27 (red) immunofluorescence staining. Scale bars = 100  $\mu\text{m}$ .

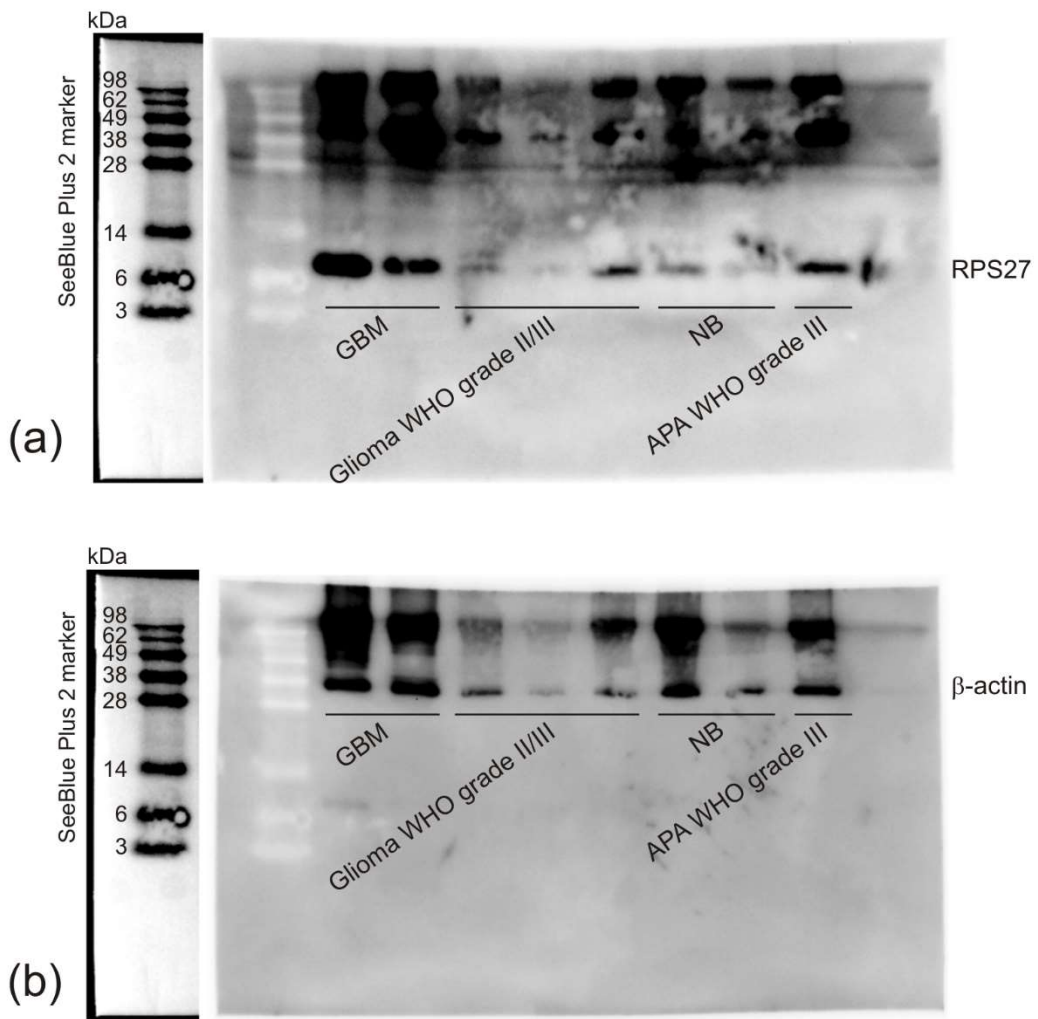

**Figure S3.** Unaltered Western blots of RPS27 and  $\beta$ -actin protein expression in randomly selected glioma samples. (a) Detection of RPS27 and (b) of the housekeeping protein  $\beta$ -actin as a loading control on 15% SDS gels. 100  $\mu$ g protein was loaded in both cases.

**Table S1.** Average optical density (OD) of DAB-stained NB and tumor specimens analyzed in Figure 5.

| Tissue type              | Average OD | SD    |
|--------------------------|------------|-------|
| NB grey matter           | 0.378      | 0.099 |
| NB white matter          | 0.302      | 0.036 |
| Gliomas WHO grade II/III | 0.296      | 0.100 |
| GBM                      | 0.294      | 0.093 |

OD = optical density; SD = standard deviation; NB = normal brain tissue; WHO = world health organization; GBM = glioblastoma.

**Table S2.** Antibodies used for immunohistochemistry and double-fluorescence staining.

| Antibody                                                                                   | Target                           | Marker                    | Species | Dilution | Method            | Manufacturer                           |
|--------------------------------------------------------------------------------------------|----------------------------------|---------------------------|---------|----------|-------------------|----------------------------------------|
| Mouse Anti-Neuronal Nuclei Monoclonal Antibody                                             | NeuN                             | Neuronal marker           | Mouse   | 1:500    | DAB, Fluorescence | Millipore (Burlington, USA)            |
| Anti-IDH1 R132H/DIA-H09 Mouse monoclonal anti-brain tumor marker                           | IDH1 R132H                       | IDH1 R132 mutation status | Mouse   | 1:20     | DAB, Fluorescence | Dianova (Hamburg, Germany)             |
| Ki67 Antibody M7240                                                                        | Ki67                             | Proliferation marker      | Mouse   | 1:800    | DAB, Fluorescence | Dako (Glostrup, Denmark)               |
| CD68 (Macrophage Marker) Ab-4 (Clone PG-M1)                                                | CD68                             | Macrophage marker         | Mouse   | 1:200    | DAB, Fluorescence | Dianova (Hamburg, Germany)             |
| GFAP Monoclonal Antibody (GA5)                                                             | GFAP                             | Astrocytic marker         | Mouse   | 1:100    | DAB, Fluorescence | Invitrogen (Waltham, USA)              |
| Mouse Monoclonal to MPS1                                                                   | RPS27                            | RPS27 protein expression  | Mouse   | 1:200    | DAB               | ProMab Biotechnologies (Richmond, USA) |
| MPS1 Polyclonal Antibody                                                                   | RPS27                            | RPS27 protein expression  | Rabbit  | 1:500    | Fluorescence      | ThermoFisher Scientific (Waltham, USA) |
| Monoclonal Anti- $\beta$ -Actin-Peroxidase Antibody                                        | $\beta$ -actin                   | Housekeeping gene         | Mouse   | 1:2500   | Western-blot      | Sigma-Aldrich (St. Louis, USA)         |
| Goat anti-Rabbit IgG (H+L), Highly Cross-Adsorbed Secondary Antibody, Alexa Fluor Plus 555 | Secondary antibody versus rabbit | Secondary antibody        | Goat    | 1:400    | Fluorescence      | ThermoFisher Scientific (Waltham, USA) |
| Goat anti-Mouse IgG (H+L), Highly Cross-Adsorbed Secondary Antibody, Alexa Fluor Plus 488  | Secondary antibody versus mouse  | Secondary antibody        | Goat    | 1:400    | Fluorescence      | ThermoFisher Scientific (Waltham, USA) |

**Table S3.** Macro used for semi-automatic picture evaluation.

| <b>Macro commands</b>                                                                                                                                                                                                                                                                                                                                                                                                                                                                                                                                                                                                                                                                                                                                                                                                                                                                                                                                                                                                                                                                                                                                                                                                                                                                                                                                                                                              |
|--------------------------------------------------------------------------------------------------------------------------------------------------------------------------------------------------------------------------------------------------------------------------------------------------------------------------------------------------------------------------------------------------------------------------------------------------------------------------------------------------------------------------------------------------------------------------------------------------------------------------------------------------------------------------------------------------------------------------------------------------------------------------------------------------------------------------------------------------------------------------------------------------------------------------------------------------------------------------------------------------------------------------------------------------------------------------------------------------------------------------------------------------------------------------------------------------------------------------------------------------------------------------------------------------------------------------------------------------------------------------------------------------------------------|
| <pre> input = getDirectory("Input directory"); output = getDirectory("Output directory"); Dialog.create("File type"); Dialog.addString("File suffix: ", ".tif", 5); Dialog.show(); suffix = Dialog.getString(); processFolder(input); function processFolder(input) {   list = getFileList(input);   for (i = 0; i &lt; list.length; i++) {     if(File.isDirectory(input + list[i]))       processFolder("" + input + list[i]);     if(endsWith(list[i], suffix))       processFile(input, output, list[i]);   } } function processFile(input, output, file) { open(input + File.separator + file); name=getTitle(); run("Colour Deconvolution", "vectors=[H DAB]"); selectWindow (name+"-(Colour_1)"); run("Conversions...", "scale"); run("8-bit"); un("Subtract Background...", "rolling=500 light"); run("Gaussian Blur...", "sigma=5"); un("Threshold..."); selectWindow (name+"-(Colour_1)"); waitForUser("Set the threshold and press OK, or cancel to exit macro. DO NOT press apply in Threshold window."); run("Convert to Mask"); selectWindow (name+"-(Colour_1)"); run("Watershed"); run("Analyze Particles...", "size=400-2000 summarize"); selectWindow (name+"-(Colour_2)"); run("Measure"); run("Conversions...", "scale"); run("8-bit"); run("Subtract Background...", "rolling=500 light"); run("Gaussian Blur...", "sigma=5"); run("Threshold..."); selectWindow (name+"-(Colour_2)"); </pre> |

---

```
waitForUser("Set the threshold and press OK, or cancel to exit macro. DO NOT press apply  
in Threshold window.");  
run("Convert to Mask");  
selectWindow (name+"-(Colour_2)");  
run("Watershed");  
run("Analyze Particles...", "size=1000-3000 summarize");  
run("Close All");  
}
```

---

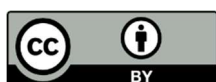

© 2020 by the authors. Licensee MDPI, Basel, Switzerland. This article is an open access article distributed under the terms and conditions of the Creative Commons Attribution (CC BY) license (<http://creativecommons.org/licenses/by/4.0/>).
